# Supplementary material for: A combined continuous wave electron paramagnetic resonance and DFT calculations of copper-doped 3∞[Cd0.98Cu0.02(prz-trz-ia)] metal–organic framework
Source: Royal Society of Chemistry journal article supplement (doi:10.1039/c7cp06420a), 2017-01-01
Supplement: c7cp06420a1.pdf [file c7cp06420a1.pdf]

A combined continuous wave electron paramagnetic resonance and DFT  
calculations of copper-doped  $\infty^3[\text{Cd}_{0.98}\text{Cu}_{0.02}(\text{prz} - \text{trz} - \text{ia})]$  metal–  
organic framework

Anastasia Kul'taeva,<sup>1</sup> Timur Biktagirov,<sup>2</sup> Jens Bergmann,<sup>3</sup> Linda Hensel,<sup>1</sup> Harald Krautscheid<sup>3</sup> and  
Andreas Pöppl\*<sup>1</sup>

<sup>1</sup>University Leipzig, Faculty of Physics and Earth Science, Linnestrasse 5, D-04103 Leipzig,  
Germany

<sup>2</sup>University Paderborn, Physics Department, 33098 Paderborn, Germany

<sup>3</sup>University Leipzig, Faculty of Chemistry and Mineralogy, Johannisallee 29, D-04103 Leipzig,  
Germany

E-mail: [poeppl@physik.uni-leipzig.de](mailto:poeppl@physik.uni-leipzig.de) Phone: +49 (0)341 9732608. Fax: +49 (0)3419732649

Supporting Information

# 1. DFT calculations for pure ${}^3_{\infty}[\text{Cu}(\text{prz} - \text{trz} - \text{ia})]$ and ${}^3_{\infty}[\text{Cd}(\text{prz} - \text{trz} - \text{ia})]$ MOFs

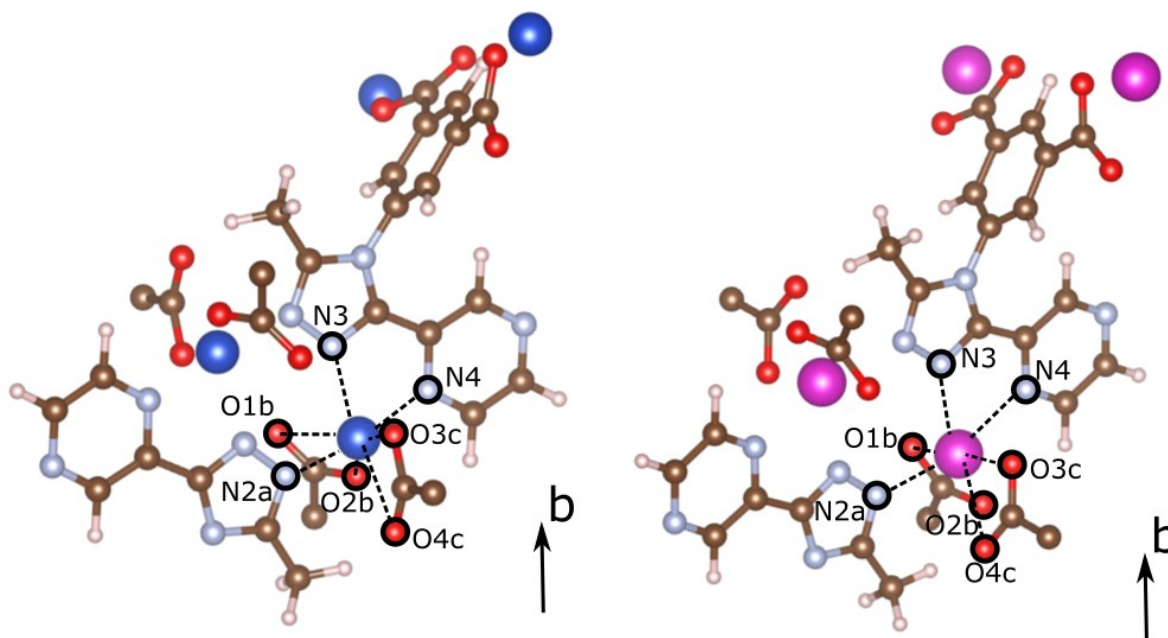

**Figure S1.** Coordination of the metal ions in  ${}^3_{\infty}[\text{Cu}(\text{prz} - \text{trz} - \text{ia})]$  (left) and  ${}^3_{\infty}[\text{Cd}(\text{prz} - \text{trz} - \text{ia})]$  (right). Arrows show the direction of the crystallographic *b* axis. The coordinating atoms are denoted in accordance with those from ref. [S1]. For DFT calculations have been used  ${}^3_{\infty}[\text{Cd}(\text{prz} - \text{trz} - \text{ia})]$ .

**Table S1.** Comparison of DFT calculated structural parameters of  ${}^3_{\infty}[\text{Cu}(\text{prz} - \text{trz} - \text{ia})]$  and  ${}^3_{\infty}[\text{Cd}(\text{prz} - \text{trz} - \text{ia})]$  obtained with various computational methods (see Materials and Methods section of the main text), and the experimental data from ref. [S1].

| Method                    | ${}^3_{\infty}[\text{Cu}(\text{prz} - \text{trz} - \text{ia})]$ |        |                                     |                                             |                                                                             |        | ${}^3_{\infty}[\text{Cd}(\text{prz} - \text{trz} - \text{ia})]$ |        |        |
|---------------------------|-----------------------------------------------------------------|--------|-------------------------------------|---------------------------------------------|-----------------------------------------------------------------------------|--------|-----------------------------------------------------------------|--------|--------|
|                           | PBE                                                             | PBE-D2 | PBE<br>$U_{\text{Cu}}=4.0\text{eV}$ | PBE-D2+ $U$<br>$U_{\text{Cu}}=4.0\text{eV}$ | PBE-D2+ $U$<br>$U_{\text{Cu}}=10.5\text{eV}$<br>$U_{\text{N}}=8.6\text{eV}$ | Expt.  | PBE                                                             | PBE-D2 | Expt.  |
| Lattice parameters        |                                                                 |        |                                     |                                             |                                                                             |        |                                                                 |        |        |
| <i>a</i> , Å              | 10.111                                                          | 10.106 | 10.122                              | 10.118                                      | 10.030                                                                      | 10.080 | 10.031                                                          | 9.916  | 9.9977 |
| <i>b</i> , Å              | 17.142                                                          | 17.166 | 17.120                              | 17.130                                      | 17.196                                                                      | 17.451 | 18.583                                                          | 18.669 | 18.289 |
| <i>c</i> , Å              | 11.981                                                          | 11.238 | 11.804                              | 11.239                                      | 11.254                                                                      | 11.519 | 12.370                                                          | 11.852 | 12.008 |
| $\alpha$ , deg            | 90.10                                                           | 89.93  | 90.10                               | 89.93                                       | 90.11                                                                       | 90.00  | 90.00                                                           | 90.00  | 90.00  |
| $\beta$ , deg             | 98.17                                                           | 102.35 | 98.65                               | 102.28                                      | 100.49                                                                      | 99.78  | 95.87                                                           | 97.60  | 100.58 |
| $\gamma$ , deg            | 89.99                                                           | 90.05  | 89.99                               | 90.09                                       | 89.95                                                                       | 90.00  | 90.00                                                           | 90.00  | 90.00  |
| <i>V</i> , Å <sup>3</sup> | 2055.4                                                          | 1904.5 | 2031.1                              | 1903.3                                      | 1907.1                                                                      | 1996.8 | 2293.7                                                          | 2174.7 | 2158.3 |
| Bond lengths, Å *         |                                                                 |        |                                     |                                             |                                                                             |        |                                                                 |        |        |

|                       |        |        |        |        |        |       |        |        |        |
|-----------------------|--------|--------|--------|--------|--------|-------|--------|--------|--------|
| M-O1b                 | 3.352  | 3.212  | 3.366  | 3.208  | 2.989  | 3.101 | 2.614  | 2.521  | 2.685  |
| M-O2b                 | 1.959  | 1.957  | 1.953  | 1.958  | 2.006  | 1.948 | 2.294  | 2.316  | 2.227  |
| M-O3c                 | 2.026  | 2.022  | 2.021  | 2.018  | 2.112  | 2.073 | 2.322  | 2.267  | 2.279  |
| M-O4c                 | 2.775  | 2.838  | 2.734  | 2.834  | 3.039  | 2.797 | 2.614  | 2.763  | 2.612  |
| M-N2a                 | 2.008  | 1.985  | 2.026  | 1.998  | 2.014  | 1.989 | 2.399  | 2.333  | 2.295  |
| M-N3                  | 2.289  | 2.240  | 2.305  | 2.263  | 2.137  | 2.214 | 2.414  | 2.376  | 2.338  |
| M-N4                  | 2.034  | 2.041  | 2.066  | 2.069  | 2.111  | 2.045 | 2.511  | 2.463  | 2.395  |
| MAD <sub>length</sub> | 0.062  | 0.035  | 0.076  | 0.042  | 0.088  |       | 0.068  | 0.080  |        |
| Bond angles, deg *    |        |        |        |        |        |       |        |        |        |
| O1b-M-O2b             | 41.27  | 44.43  | 40.83  | 44.51  | 49.24  | 45.5  | 53.96  | 55.17  | 52.44  |
| O1b-M-O3c             | 158.23 | 168.43 | 158.23 | 166.77 | 176.05 | 172.3 | 165.99 | 170.73 | 169.42 |
| O2b-M-N2a             | 89.10  | 92.85  | 88.97  | 93.20  | 93.78  | 92.3  | 101.45 | 101.22 | 95.92  |
| O2b-M-N4              | 92.27  | 87.82  | 92.24  | 87.91  | 87.13  | 87.7  | 84.92  | 83.10  | 85.30  |
| N2a-M-N3              | 96.62  | 96.56  | 96.95  | 96.68  | 98.27  | 97.6  | 96.81  | 99.50  | 99.28  |
| N2a-M-N4              | 172.77 | 173.06 | 172.31 | 172.33 | 175.44 | 173.4 | 158.61 | 162.06 | 162.39 |
| N3-M-N4               | 76.63  | 77.49  | 75.91  | 76.58  | 78.42  | 77.5  | 67.65  | 68.68  | 69.79  |
| MAD <sub>angle</sub>  | 4.08   | 1.00   | 4.28   | 1.51   | 1.88   |       | 2.75   | 1.89   |        |

\*For calculated bond lengths and bond angles, the values of mean average difference (MAD) are

$$MAD = \sum_i^N \frac{abs(x_i - x_i^{expt})}{N}$$

also presented: , where  $x$  is either a bond length or a bond angle.

## 2.EPR spectroscopy of $^3[Cd_{0.98}Cu_{0.02}(prz - trz - ia)]$

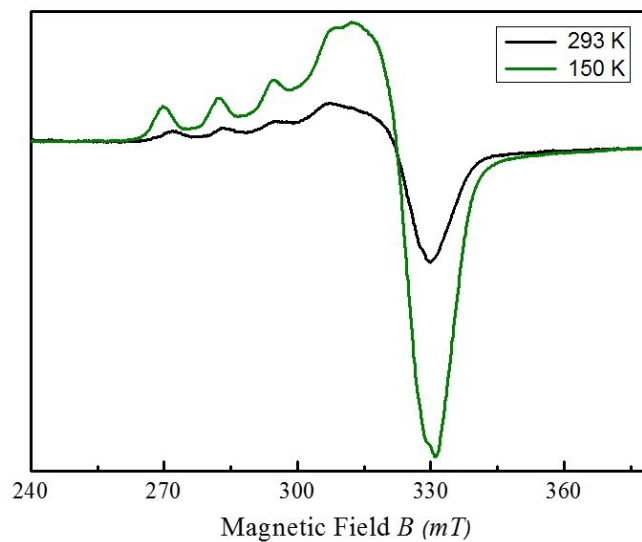

**Figure S2.** Experimental X-band CW EPR spectra of **asCu<sub>0.02</sub>Cd** recorded at 150 K and 293 K.

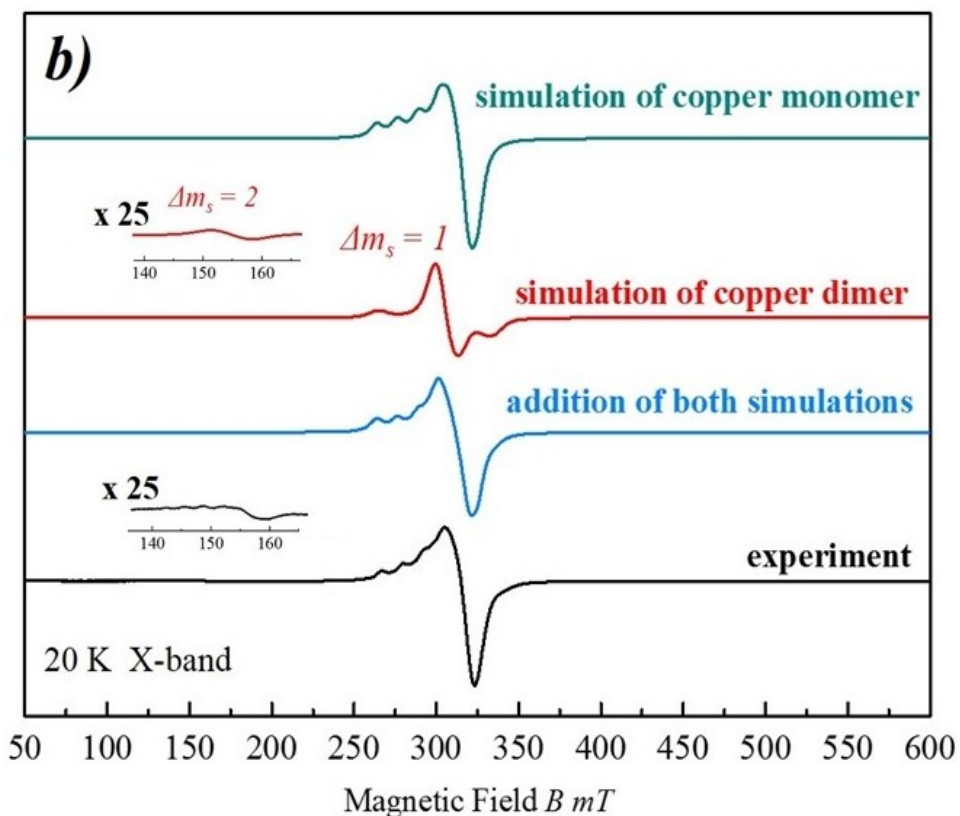

**Figure S3:** Experimental and simulated Q-band (a) and X-band (b) CW EPR spectra of  $\text{asCu}_{0.02}\text{Cd}$  recorded at 20K. The simulation of copper dimer with  $S = 1$  was performed by using EasySpin program with the following spin Hamiltonian parameters  $g_{zz} = 2.33(1)$ ,  $g_{xx,yy} = 2.09(1)$ ,  $|D| = 600$  MHz.

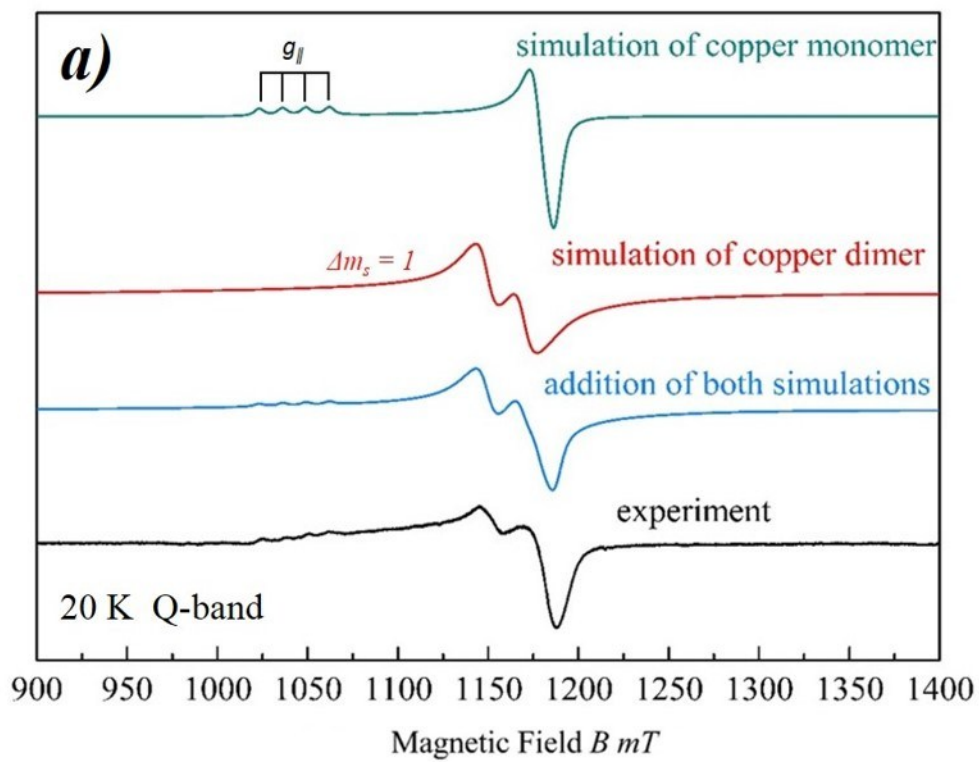

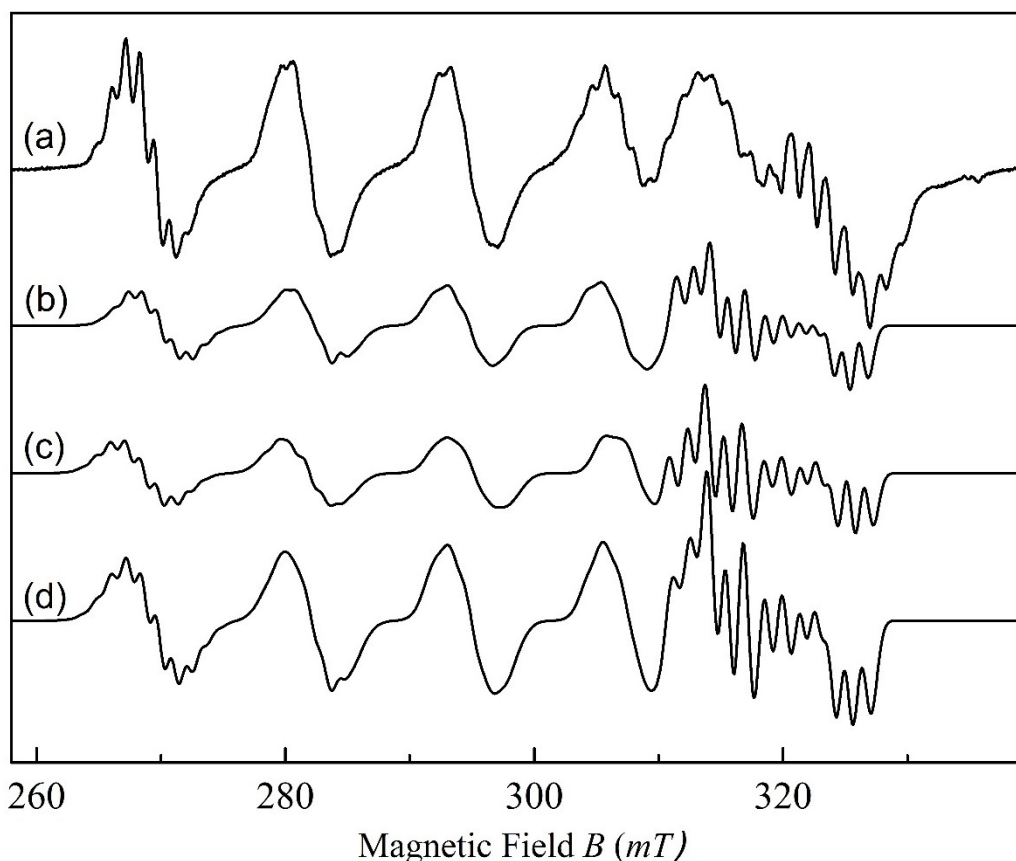

**Figure S4:** X-band EPR spectrum of an  $asCu_{0.02}Cd$  crystal at 20K for  $B_0$  within the  $bc^*$  plane and  $\angle(B_0, b) = 45^\circ$ : (a) experimental spectrum, (d) sum of simulated spectra of (b) the  $^{63}Cu$ , and (c)  $^{65}Cu$  isotopes. The  $^{14}N$  shf splitting into more than five lines results from the inequivalence of the two  $^{14}N$  nuclei and depends crucial on the difference in their isotropic shf interaction constants  $A_{iso,1}^N$  and  $A_{iso,2}^N$ . Both  $Cu^{2+}$  species A and B have been included in the simulation. For corresponding simulation parameters see Table I.

### 3. DFT calculations for a single substitutional Cu atom in MOF

For all the methods applied for structural optimization, initial geometries were built from the relaxed  ${}^3[Cd(prz - trz - ia)]$  supercell with one cadmium ion being further substituted with copper ion. For all the obtained geometries, the EPR parameters were calculated within the same computational framework in Orca package (for details, see Materials and Methods section of the main text).

**Table S2.** DFT calculated EPR parameters, spin density localization and structural information for a single substitutional Cu atom in MOF supercell (containing 272 atoms) with the geometry optimized by the various computational schemes considered in this work.

|                | PBE | PBE-D2 | PBE+U<br>$U_{Cu} = 4.0$ eV | PBE-D2+U<br>$U_{Cu} = 4.0$ eV | PBE-D2+U<br>$U_{Cu} = 10.5$ eV<br>$U_N = 8.6$ eV |
|----------------|-----|--------|----------------------------|-------------------------------|--------------------------------------------------|
| EPR parameters |     |        |                            |                               |                                                  |

|                                                                   |                            |                            |                            |                            |                            |
|-------------------------------------------------------------------|----------------------------|----------------------------|----------------------------|----------------------------|----------------------------|
| ( $g_{xx}$ $g_{yy}$ $g_{zz}$ )                                    | 2.0540<br>2.0948<br>2.2356 | 2.0659<br>2.0694<br>2.2168 | 2.0459<br>2.1090<br>2.2400 | 2.0600<br>2.0828<br>2.2239 | 2.0726<br>2.0802<br>2.2329 |
| ( $\alpha$ $\beta$ $\gamma$ ) <sub>g</sub> , deg *                | -88.59<br>154.14<br>71.60  | -84.05<br>60.40<br>125.50  | -87.88<br>152.41<br>73.82  | -83.35<br>60.85<br>94.13   | -80.74<br>59.87<br>103.59  |
| Cu:<br>( $A_{xx}$ $A_{yy}$ $A_{zz}$ ),<br>MHz                     | 23.25<br>125.52<br>-474.02 | 94.82<br>59.10<br>-491.70  | 14.40<br>171.20<br>-439.83 | 84.51<br>115.00<br>-463.82 | 112.20<br>81.93<br>-455.32 |
| ( $\alpha$ $\beta$ $\gamma$ ) <sub>A</sub> , deg **               | -22.9<br>2.7<br>-68.6      | 22.3<br>1.6<br>98.6        | -16.6<br>3.0<br>-74.2      | 23.1<br>1.8<br>75.1        | 15.6<br>1.8<br>82.8        |
| N2a:<br>( $A_{xx}$ $A_{yy}$ $A_{zz}$ ),<br>MHz                    | 0.10<br>-0.73<br>-0.77     | 44.46<br>45.69<br>53.99    | 0.07<br>0.11<br>1.05       | 42.66<br>43.84<br>51.89    | 40.25<br>41.28<br>49.77    |
| N3:<br>( $A_{xx}$ $A_{yy}$ $A_{zz}$ ),<br>MHz                     | 28.74<br>29.67<br>35.35    | -0.20<br>-1.21<br>-1.35    | 26.99<br>27.85<br>33.17    | -0.56<br>-1.50<br>-1.62    | -0.30<br>-1.29<br>-1.38    |
| N4:<br>( $A_{xx}$ $A_{yy}$ $A_{zz}$ ),<br>MHz                     | -0.70<br>-1.32<br>-1.43    | 31.01<br>32.19<br>40.75    | -0.59<br>-1.24<br>-1.32    | 28.50<br>29.58<br>37.60    | 25.26<br>26.19<br>35.11    |
| Spin densities at the nuclei of ligand atoms, a.u./Å <sup>3</sup> |                            |                            |                            |                            |                            |
| O1b                                                               | -0.004                     | -0.009                     | -0.004                     | -0.008                     | -0.009                     |
| O2b                                                               | 0.338                      | 0.313                      | 0.324                      | 0.309                      | 0.282                      |
| O3c                                                               | 0.306                      | 0.347                      | 0.307                      | 0.336                      | 0.294                      |
| O4c                                                               | 0.351                      | 0.007                      | 0.329                      | 0.012                      | 0.006                      |
| N2a                                                               | -0.010                     | 1.004                      | 0.009                      | 0.964                      | 0.914                      |
| N3                                                                | 0.653                      | -0.019                     | 0.613                      | -0.026                     | -0.021                     |
| N4                                                                | -0.024                     | 0.724                      | -0.022                     | 0.666                      | 0.603                      |
| Bond lengths, Å                                                   |                            |                            |                            |                            |                            |
| M-O1b                                                             | 3.070                      | 3.076                      | 3.058                      | 3.061                      | 3.165                      |
| M-O2b                                                             | 1.980                      | 2.011                      | 1.981                      | 2.007                      | 2.037                      |
| M-O3c                                                             | 2.160                      | 2.055                      | 2.138                      | 2.057                      | 2.111                      |
| M-O4c                                                             | 2.067                      | 2.671                      | 2.093                      | 2.624                      | 2.607                      |
| M-N2a                                                             | 2.445                      | 2.046                      | 2.464                      | 2.071                      | 2.072                      |
| M-N3                                                              | 2.043                      | 2.264                      | 2.091                      | 2.285                      | 2.208                      |
| M-N4                                                              | 2.552                      | 2.138                      | 2.521                      | 2.181                      | 2.211                      |

| Bond angles, deg |        |        |        |        |        |
|------------------|--------|--------|--------|--------|--------|
| O1b-M-O2b        | 47.64  | 47.61  | 47.89  | 47.91  | 45.76  |
| O1b-M-O3c        | 125.41 | 116.21 | 125.19 | 117.23 | 117.82 |
| O2b-M-N2a        | 99.62  | 97.34  | 99.06  | 97.47  | 97.25  |
| O2b-M-N4         | 92.36  | 88.60  | 92.20  | 88.59  | 88.97  |
| N2a-M-N3         | 105.31 | 99.32  | 103.20 | 99.08  | 101.22 |
| N2a-M-N4         | 167.88 | 172.10 | 168.05 | 171.25 | 173.18 |
| N3-M-N4          | 72.49  | 75.25  | 72.37  | 74.42  | 75.51  |

\*Orientations of the  $g$ -tensor are determined with respect to an  $a$ - $b$ - $c$ \* coordinate frame. Euler angles specify  $z$ - $y$ - $z$  rotation. The orientations are provided for a chosen  $\text{Cu}^{2+}$  site, while the principle axes directions for symmetry inequivalent sites are implied by the symmetry operations of  $\text{P2}_{1/n}$  space group.

\*\*Orientation of Cu hyperfine coupling tensor is defined with respect to the  $g$ -tensor. The principle axes  $A_X$ ,  $A_Y$ ,  $A_Z$  are assigned such that the Euler rotation is minimal.

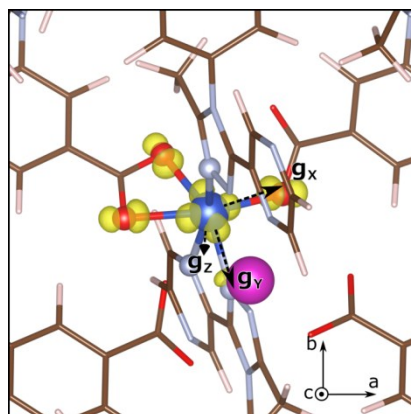

**Figure S5.**  $\text{Cu}^{2+}$  center in  $\text{asCu}_{0.02}\text{Cd}$  as optimized using DFT-PBE+ $U$  method (without dispersion correction) viewed along the crystallographic  $c$  axis. The principal axes frame of the calculated tensor  $g$  is indicated by dashed arrows. Isosurfaces (isovalue of 0.05 electron/ $\text{\AA}^3$ ) illustrate the spin density distribution.



**Table S3.** An example of a hydrogen-terminated molecular cluster cut from the structure optimised with Quantum Espresso (PBE-D2+U with  $U_{\text{Cu}} = 4$  eV) and used for calculating the EPR parameters in ORCA. The coordinates are in angstroms.

|     |          |          |          |
|-----|----------|----------|----------|
| O 2 |          |          |          |
| Cu  | 3.71543  | 10.18480 | 4.09106  |
| Cd  | 4.32261  | 8.38832  | 8.07501  |
| C   | 2.72307  | 1.80243  | 2.83195  |
| C   | 5.33417  | 16.83230 | 9.11827  |
| C   | 1.56408  | 11.30265 | 3.03482  |
| C   | 11.02482 | 10.86071 | 3.58549  |
| C   | 6.79057  | 7.53204  | 8.91351  |
| C   | 7.74843  | 2.49302  | 2.59820  |
| C   | 0.30939  | 16.14936 | 9.37879  |
| C   | 6.00859  | 11.84746 | 3.89164  |
| C   | -3.55228 | 11.50897 | 3.36604  |
| C   | 1.90080  | 7.07146  | 8.40568  |
| C   | 5.23074  | 2.16542  | 2.74713  |
| C   | 2.82230  | 16.48950 | 9.18501  |
| C   | 8.52455  | 11.31623 | 3.64124  |
| C   | -1.01192 | 11.40219 | 3.25128  |
| H   | 5.34398  | 1.15454  | 2.34653  |
| H   | 2.72230  | 17.47032 | 9.65741  |
| H   | 8.39552  | 10.32212 | 4.07945  |
| H   | -1.05516 | 10.38189 | 3.64307  |
| C   | 3.95403  | 2.63229  | 3.08395  |
| C   | 4.09255  | 16.04167 | 8.79873  |
| C   | 0.21638  | 11.97371 | 2.89025  |
| C   | 9.81950  | 11.73339 | 3.29195  |
| C   | 6.35411  | 2.98269  | 2.90893  |
| C   | 1.69335  | 15.68489 | 8.99592  |
| C   | 7.43089  | 12.17338 | 3.47473  |
| C   | -2.20432 | 12.12645 | 3.09602  |
| C   | 3.80853  | 3.91609  | 3.61930  |
| C   | 4.22473  | 14.79357 | 8.18289  |
| C   | 0.23606  | 13.26859 | 2.36028  |
| C   | 10.01070 | 13.00136 | 2.73119  |
| H   | 2.81655  | 4.26400  | 3.92066  |
| H   | 5.21176  | 14.44978 | 7.86154  |
| H   | 1.18839  | 13.69753 | 2.03700  |
| H   | 11.01739 | 13.31566 | 2.44266  |
| C   | 6.20188  | 4.28613  | 3.39622  |
| C   | 1.83405  | 14.41192 | 8.43196  |
| C   | 7.63310  | 13.45447 | 2.94420  |
| C   | -2.17207 | 13.44026 | 2.61230  |
| H   | 7.08578  | 4.92097  | 3.50371  |
| H   | 0.95250  | 13.77456 | 8.32349  |
| H   | 6.77781  | 14.12746 | 2.84237  |
| H   | -3.10907 | 13.99352 | 2.50819  |
| C   | 4.93278  | 4.72764  | 3.75544  |
| C   | 3.09522  | 13.99343 | 8.02568  |
| C   | 8.91285  | 13.84485 | 2.57380  |
| C   | -0.94750 | 13.98776 | 2.24827  |
| C   | 5.35728  | 5.17025  | 6.67247  |
| C   | 2.62708  | 13.40294 | 5.14561  |
| C   | 8.50369  | 14.41760 | -0.32798 |
| C   | -1.40338 | 14.52690 | -0.64514 |
| H   | 6.33975  | 4.76154  | 6.38019  |
| H   | 1.52720  | 13.47082 | 5.21152  |
| H   | 7.52785  | 13.99199 | -0.03814 |
| H   | -2.33577 | 14.02870 | -0.33080 |
| H   | 4.63271  | 4.33776  | 6.66102  |
| H   | 3.04176  | 14.39566 | 5.38113  |
| H   | 9.23885  | 13.59642 | -0.35969 |
| H   | -0.60652 | 13.76606 | -0.70774 |
| H   | 5.39063  | 5.58794  | 7.68872  |
| H   | 2.93623  | 13.11978 | 4.13264  |
| H   | 8.45857  | 14.87506 | -1.32553 |

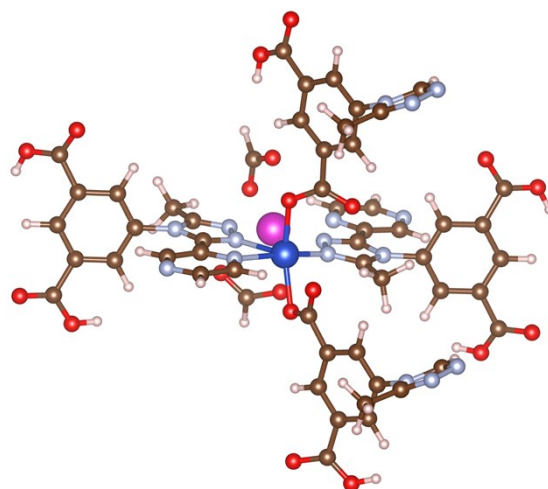

|   |          |          |          |
|---|----------|----------|----------|
| H | -1.50573 | 14.98246 | -1.63920 |
| C | 4.93192  | 6.21672  | 5.72254  |
| C | 3.13314  | 12.41428 | 6.11534  |
| C | 8.92728  | 15.42236 | 0.66305  |
| C | -1.01446 | 15.55492 | 0.33740  |
| C | 4.34588  | 7.21751  | 3.86524  |
| C | 3.74198  | 11.54566 | 8.03736  |
| C | 9.48368  | 16.32817 | 2.58129  |
| C | -0.44859 | 16.47911 | 2.24623  |
| C | 4.04399  | 7.59629  | 2.49301  |
| C | 4.02591  | 11.32111 | 9.45746  |
| C | 4.01580  | 6.71570  | 1.40006  |
| C | 3.92441  | 12.28424 | 10.47920 |
| H | 4.24202  | 5.65280  | 1.53637  |
| H | 3.59887  | 13.30630 | 10.27389 |
| C | 3.44488  | 8.42891  | 0.00600  |
| C | 4.62860  | 10.75694 | 12.03473 |
| H | 3.21837  | 8.76884  | -1.01284 |
| H | 4.85309  | 10.52747 | 13.08409 |
| C | 3.47779  | 9.32517  | 1.08233  |
| C | 4.72548  | 9.78307  | 11.03390 |
| H | 3.25836  | 10.39199 | 0.97816  |
| H | 5.04659  | 8.75223  | 11.22890 |
| N | 4.77221  | 6.01427  | 4.37658  |
| N | 3.26898  | 12.69155 | 7.44597  |
| N | 9.10176  | 15.14726 | 1.99366  |
| N | -0.87074 | 15.30291 | 1.67725  |
| N | 4.62145  | 7.47782  | 5.99593  |
| N | 3.51791  | 11.15439 | 5.91070  |
| N | 9.19443  | 16.70665 | 0.45899  |
| N | -0.70834 | 16.82707 | 0.11469  |
| N | 4.25182  | 8.09769  | 4.85076  |
| N | 3.89102  | 10.61545 | 7.10068  |
| N | 9.54460  | 17.26561 | 1.64367  |
| N | -0.35393 | 17.39710 | 1.29376  |
| N | 3.76298  | 8.91126  | 2.32048  |
| N | 4.42229  | 10.07018 | 9.76800  |
| N | 3.70708  | 7.12472  | 0.16473  |
| N | 4.22724  | 12.00296 | 11.75269 |
| O | 2.79920  | 0.79445  | 2.08372  |
| O | 5.25536  | 17.81925 | 9.89600  |
| O | 1.67432  | 10.33794 | 3.88097  |
| O | 10.87845 | 9.78204  | 4.19092  |
| O | 6.86832  | 8.52319  | 8.14281  |
| O | 1.62506  | 2.23075  | 3.34991  |
| O | 6.43926  | 16.39227 | 8.62997  |
| O | 2.52340  | 11.77745 | 2.37958  |
| O | 12.16279 | 11.36240 | 3.21484  |
| O | 5.69687  | 7.11621  | 9.44639  |
| O | 7.92137  | 1.21769  | 2.71610  |
| O | 0.12167  | 17.42512 | 9.30362  |
| O | 5.65374  | 10.60416 | 3.78083  |
| O | -3.64160 | 10.23714 | 3.32180  |
| O | 2.03859  | 8.34672  | 8.46258  |
| O | 8.62382  | 3.32360  | 2.28516  |
| O | -0.54822 | 15.30403 | 9.70533  |
| O | 5.30482  | 12.79453 | 4.27375  |
| O | -4.53953 | 12.27723 | 3.56032  |
| O | 2.83407  | 6.26536  | 8.16309  |
| H | 7.20202  | 0.66762  | 2.95680  |
| H | 1.63126  | 2.98877  | 3.90068  |
| H | -4.41353 | 13.20544 | 3.58282  |
| H | 10.01972 | 9.48834  | 4.42393  |
| H | 4.42056  | 18.09455 | 10.22047 |
| H | -0.32310 | 14.39490 | 9.73316  |
| H | -0.24010 | 16.62431 | 3.24647  |
| H | 9.68885  | 16.46394 | 3.58354  |
| H | 7.75948  | 6.98418  | 9.69935  |
| H | 0.95427  | 6.65191  | 9.15663  |

#### 4. Correlated g and A strain effects

For the simulations of the single crystal spectra with nitrogen **shfs** (see Figure 6 in main manuscript) we have assumed a Gaussian distribution of the  $g_{zz}(i)$  values. The **hf coupling** parameters  $A_{zz}(i)$  are in first approximation assumed to be correlated with the Gaussian distributed values  $g_{zz}(i)$  by

$$A_{zz}(i) = -m \cdot g_{zz}(i) + k$$

where  $m$  and  $k$  are fitted to the respective EPR spectra.

The following values for the spectral simulations with correlated g and A strain effects have been taken:  $\Delta g_{\parallel} = 0.009$ ,  $m = 900$  MHz,  $k = 1674$  MHz.

#### References

S1. Bergmann J, Stein K, Kobalz M, Handke M, Lange M, Möllmer J, Heinke F, Oeckler O, Gläser R, Staudt R, Krautscheid H. A series of isomorphous Metal-Organic Frameworks with rtl topology–Metal distribution and tunable sorption capacity via substitution of metal ions. *Microporous and Mesoporous Materials* 2015, **216**, 56-63.
